1 **Can crop phenology and plant height be channelized to improvise wheat productivity**  
2 **in diverse production environments?**

3

4 D Mohan, H M Mamrutha, Rinki Khobra, Gyanendra Singh and GP Singh

5 ICAR - Indian Institute of Wheat and Barley Research, Karnal, Haryana-132001, India

6

7 **Correspondence:** [devmohan@gmail.com](mailto:devmohan@gmail.com)

8

9 **Abstract**

10 Non-grain parameters like height, flowering and maturity should also be tried to break yield  
11 plateau in wheat. This study explores such possibilities by analysing performance of released and  
12 pre-released varieties evaluated in ten diverse production environments of India during the period  
13 2000-2020. Regression analysis supports relevance of such non-grain determinants in grain yield  
14 under every environment but magnitude of impact can vary. Collective contribution of non-grain  
15 parameters can be high in a production environment where growth condition is most favourable  
16 for wheat growth and every factor is important in such situations. They contribute less in the  
17 environments engrossed with abiotic stress and merely one or two factors can be earmarked for  
18 selection. Besides yield, this selection strategy can also enhance grain weight in certain  
19 environments. At a time when selection for grain attributes is not providing further push; it would  
20 be worth trying to explore these non-grain field indicators as selection strategy for further  
21 advancement in productivity and grain weight of bread wheat.

22

23

24 **Keywords:** Grain yield, Indian wheat, non-grain yield determinants, phenology, production  
25 environments

26

## 27 **Introduction**

28 Wheat (*Triticum aestivum* L.) is grown under diverse agro-ecological conditions across the globe. In  
29 India also, it is cultivated under different production environments where growth conditions differ  
30 and so is the yield harvest. It is obvious that besides productivity, field expression must also be  
31 differing under diverse growth environment (Pandey *et al.*, 2015; Sharma *et al.*, 2019). Thus,  
32 understanding of the changes occurring in the grain and non-grain yield parameters and the inter  
33 trait relationship become important for the wheat breeders for further hike in yield potential. Plant  
34 phenology which describes the timing of plant development has been acknowledged as a major  
35 aspect of plant response to environment. Changing crop phenology can serve as important bio-  
36 indicator in the era of climate change (Asseng *et al.*, 2017; Rezaei *et al.*, 2018). The adapted early  
37 flowering cultivars successfully advance the onset of anthesis and the enforced longer grain filling  
38 period reduces or avoids the risks of exposure to enhanced drought and heat stresses in late spring  
39 (Solanki *et al.*, 2017; Yang *et al.*, 2019). Optimal height under given environmental condition is vital  
40 for adaptability, productivity and yield stability of the wheat cultivars (Bognár *et al.*, 2007) whereas  
41 maturity duration is the major genotypic cause of genotype-environment interaction (Garatuza-  
42 Payan *et al.*, 2018; Singh *et al.*, 2017; Xie *et al.*, 2015).

43 Traditionally, grain number and grain weight have been recognized as main constituent of  
44 wheat yield (Brinton and Uauy, 2019; Garatuza-Payan *et al.*, 2018) and wheat breeding programme  
45 emphasise increase in the grain number through better tillering and spike characteristics. In some  
46 wheat breeding centres of India, grain weight is also addressed in combination with the heat  
47 tolerance programme (Braun *et al.*, 2010; Mishra *et al.*, 2014; Mondal *et al.*, 2016). Still, the yield  
48 level keeps staggering and raising of the yield bar even by 5-10% turn out to be a difficult  
49 proposition in certain regions. At this juncture, it is imperative to explore the role and contribution  
50 of non-grain parameters (NGP's) namely plant height, maturity duration and heading days. It is a  
51 general perception that adversary of climate change in wheat is first realised on NGP's and later

52 reflected in grain yield and size of the grain. Increased height and crop duration under favourable  
53 growth condition often results in higher biomass production and accumulates more grain yield  
54 (Reynolds *et al.*, 2009). Although NGP's are influenced by the abiotic factors; genetic constitution  
55 also modulates their role in ascribing varietal differences. Therefore, it is crucial to understand  
56 whether selection exercised on these field indicators can lead to yield improvement, if so up to  
57 what extent and under which environment they can be exploited. Such studies attain more  
58 prominence when production environments are highly diverse as observed in India. Few reports  
59 from India have highlighted variations in the grain and non-grain attributes of wheat under diverse  
60 growth environments (Mohan *et al.*, 2011; Mohan *et al.*, 2017). However, a comparative study to  
61 demonstrate their contribution and potential role in yield enhancement without exerting any  
62 undesired effect on grain size was lacking. Yield is expensive to pursue, therefore other objectives  
63 must be attained before wide scale yield evaluation. Indian wheat programme provides perfect  
64 platform for such investigations where high-yield genotypes of different genetic background are  
65 being tested in several productions environments for a long time and data has been generated on  
66 plant height, days to heading and maturity duration, grain yield and grain weight. Examining long-  
67 term yield data of Indian wheat research programme, this study is an attempt to i) emulate  
68 differential impact of NGP's and understand the interrelationship pattern, ii) realize their  
69 comparative contribution in grain yield, iii) suggest ways to tap their potential for further increase  
70 in wheat productivity and iv) search possibilities of simultaneous improvement in grain yield and  
71 grain.

72

### 73 **Material and methods**

#### 74 *Source of data*

75 The All India Coordinated Research Project on Wheat and Barley (AICRPW&B) conducts yield  
76 evaluation trials to identify wheat genotypes suitable for a particular production environment. The

77 trials are conducted in two trial series i.e. timely-sown (TS) and late-sown (LS) in five wheat zones  
78 of the country namely northern hills zone (NHZ), north-western plains zone (NWPZ), north-eastern  
79 plains zone (NEPZ), central zone (CZ) and peninsular zone (PZ). This study analysed the data  
80 generated by this national wheat research programme of India for the period 2000 to 2020.

81  
82 arch ppexamined performance of the checks (released varieties) and the new test entries that  
83 reached final year of testing (pre-released varieties) during the 20 year period 2000-19.

84  
85 *Study material and production environments*

86 Study material involved released varieties (checks) and the pre-released high yielding wheat  
87 varieties (entries in final year of testing) evaluated in advance varietal trials of AICRPW&B in ten  
88 production environments i.e. two production conditions (TS and LS) and five zones. NHZ that  
89 covers hills and foothills of the Himalayas has long winter with low temperature while NWPZ and  
90 NEPZ represented the Indo-Gangetic plains (IGP). Study material involved released and pre-  
91 released high yielding wheat varieties evaluated in two trial series of advance varietal trials  
92 constituted by AICRPW&B in five diverse zones of the country i.e. NHZ, NWPZ, NEPZ, CZ and PZ.  
93 NHZ that covers hills and foothills of the Himalayas has long winter with low temperature while  
94 NWPZ and NEPZ represent the IGP. Among the five zones, NWPZ is the most productive wheat belt  
95 of India. Climatic conditions in this zone are most ideal for wheat growth. In comparison, winter is  
96 short and climate is normally humid in NEPZ. Wheat crop in CZ often face soil moisture stress and  
97 high temperature as climate is hot and dry in this part of India. Peninsula in down south i.e. PZ has  
98 similar temperature and soil but climate is not that dry. Planting of timely-sown wheat (TSW)  
99 started with the onset of winter and was mostly completed by the end of October in the hills and by  
100 the middle of November in the plains. The late-sown wheat (LSW) was planted 15-20 days after the  
101 sowing schedule of TSW. Since LSW gets shorter life span therefore short duration genotypes fit in

102 this category. Fertilizer dose in TSW was 150N:60P:40K kg $ha^{-1}$  in NWPZ/ NEPZ and 120N:60P:40K  
103 kg $ha^{-1}$  in the CZ/ PZ and NHZ whereas dosage in LSW was 90N:60P:40K kg $ha^{-1}$  throughout the  
104 country. No chemical was sprayed while raising the crop under these production environments.

105

#### 106 *Variables and statistical analysis*

107 Since the trials involved multiple test sites, the zonal mean of each test entry was computed for  
108 plant height (HT), days to maturity (DM), days to heading (DH), 1000 grain weight (TGW) and grain  
109 yield. DH denoted the vegetative duration whereas difference between DM and DH represented the  
110 grain filling duration (GFD) or the reproductive phase. Standardised data of each environment was  
111 computed for regression analysis to assess relationship of NGP's in grain yield and grain weight.  
112 Coefficient of determination ( $R^2$ ) derived separately for individual or composite factors highlighted  
113 comparative contribution of the NGP's individually and in combination. Pearson correlation  
114 coefficient was calculated to understand association amongst the NGP's whereas coefficient of  
115 variation (CV) was derived to estimate the level of diversity in different parameters. Difference  
116 occurring in mean of two populations was compared by "t-test".

117

## 118 **Results and discussion**

### 119 *Diversity in production environments*

120 The ten production environments analysed in this study were quite diverse in expression of yield  
121 and yield determining attributes (Table 1). Overall performance and the information provided on  
122 field expressions during the 21 years revealed significant yield difference between two zones of IGP  
123 i.e. NWPZ and NEPZ even when there was no difference in plant height. Difference in height was  
124 conspicuous between NHZ and PZ under timely-sown condition as the NHZ crop was 15 cm taller  
125 than PZ. NHZ also had 62 days maturity duration advantage in comparison to PZ but there was  
126 hardly any difference in wheat productivity and TGW. Overall productivity was highest in NWPZ

127 and CZ and the yield levels also matched in both category of wheat i.e. TSW and LSW even though  
 128 large maturity difference existed in both categories of wheat. Comparison of reproductive phase  
 129 very clearly spelt that whatsoever be the difference in maturity duration; time taken to complete  
 130 grain filling did not differ much. Under timely-sown condition, it was only CZ where grain maturity  
 131 was completed in 50 days otherwise this process had taken 43-45 days in all other zones. Grain  
 132 weight in TSW of CZ was exceptionally due to longer reproductive phase. In late-sown wheat,  
 133 reduction in comparison to timely-sown material was obvious in all variables but zone-wise  
 134 differentiation was same as observed in TSW. Mean yield of LSW was very low in NHZ mainly  
 135 because HT was reduced drastically.

136 **Table 1.** Overall mean and coefficient of variation for six metric traits under diverse production  
 137 environments of India

| Characteristic                      | Timely-sown wheat |               |            |            |             | Late-sown wheat |              |            |            |             |
|-------------------------------------|-------------------|---------------|------------|------------|-------------|-----------------|--------------|------------|------------|-------------|
|                                     | NWPZ<br>(123)     | NEPZ<br>(136) | CZ<br>(58) | PZ<br>(70) | NHZ<br>(95) | NWPZ<br>(121)   | NEPZ<br>(86) | CZ<br>(89) | PZ<br>(79) | NHZ<br>(62) |
| Grain yield (g · m <sup>2</sup> )   | 509               | 422           | 492        | 436        | 427         | 416             | 356          | 426        | 386        | 284         |
| Heading days                        | 96.8              | 79.3          | 67.7       | 61.2       | 126         | 82.6            | 67.7         | 62.2       | 56.4       | 105         |
| Maturity days                       | 142               | 122           | 117        | 106        | 169         | 121             | 107          | 106        | 97.2       | 145         |
| Grain filling days                  | 45.6              | 43.0          | 49.6       | 44.4       | 43.5        | 38.3            | 39.6         | 43.7       | 40.8       | 40.0        |
| Plant height (cm)                   | 93.8              | 91.6          | 88.7       | 82.4       | 98.7        | 88.2            | 85.7         | 80.2       | 79.3       | 82.5        |
| 1000-grain weight (g)               | 38.7              | 40.4          | 44.1       | 41.4       | 40.1        | 36.6            | 37.4         | 40.5       | 39.5       | 39.4        |
| <i>Coefficient of variation (%)</i> |                   |               |            |            |             |                 |              |            |            |             |
| Grain yield                         | 10.2              | 08.9          | 08.4       | 09.8       | 15.1        | 09.8            | 09.0         | 09.9       | 09.1       | 19.8        |
| Heading days                        | 05.1              | 05.4          | 07.6       | 06.1       | 06.4        | 04.1            | 04.9         | 05.9       | 06.1       | 07.3        |
| Maturity days                       | 02.8              | 02.7          | 03.3       | 04.2       | 04.5        | 02.4            | 03.1         | 03.1       | 04.1       | 04.6        |
| Grain filling days                  | 07.3              | 06.5          | 06.5       | 06.3       | 15.8        | 07.5            | 07.5         | 06.1       | 08.8       | 15.3        |
| Plant height                        | 06.6              | 07.8          | 04.1       | 06.8       | 07.1        | 05.2            | 07.2         | 06.9       | 06.0       | 09.4        |
| 1000-grain weight                   | 06.4              | 06.4          | 09.7       | 08.2       | 11.2        | 07.6            | 05.9         | 06.1       | 07.2       | 14.1        |

138 Figure in parenthesis indicate total number of entries evaluated during the 20-year study period

139

140 It was evident that wheat productivity did not commensurate with HT and DM in the same  
141 manner under varying agro-climatic conditions. Unlike the plains, yield advantage due to HT or DM  
142 was hard to realize in the hill region as cold stress might have restricted advantage of HT or DM in  
143 TSW. Situation further aggravated in NHZ when there was ceiling on crop duration due to late  
144 planting. This kind of abiotic stress led to reduction in HT; consequently, productivity in NHZ-LS  
145 environment was lowest in the country. NWPZ and CZ were distinct from other zones in both  
146 categories of wheat even though disparity persisted in DM and HT. Even with longer crop duration;  
147 GFD in NWPZ was always shorter in comparison to CZ. As a result, improved grain weight  
148 compensated the yield loss in CZ which the reduced grain number might have incurred because of  
149 shorter vegetative period. Comparison of NWPZ and NEPZ revealed significant differences in  
150 maturity and productivity even though there was no big difference in HT. It underlined that  
151 association of the NGP's with wheat yield is based upon the growth conditions prevailing in that  
152 particular environment. Influence of NGP's on wheat productivity cannot be adjudged from  
153 differential wheat expression noticed under varying environments. It just helps to understand  
154 characteristic features of wheat expression of different production environments.

155

#### 156 *Divergence in NGP's interrelationship*

157 Understanding of relationship amongst the NGP's is crucial before analysing their impact on wheat  
158 productivity. It was observed that besides overall expression, magnitude of variability also differed  
159 in study material of each environment (Table 1). There were certain commonalities also in the  
160 phenological expressions like CV derived for DM was always less in comparison to DH and GFD in  
161 each environment and GFD expressed more variations in comparison to DH and DM in majority of  
162 the cases. Maturity differences were lowest in the region where climate was most conducive for  
163 wheat growth i.e. NWPZ. NHZ was distinct from the plains as variations in GFD, grain yield and  
164 TGW were quite high. DM was less variable in NWPZ under both production conditions. HT

165 variations were highest in LSW of NHZ and lowest in TSW of CZ. It was an indication that  
 166 relationship between the NGP's and their association with grain yield could differ in divergent  
 167 production environments.

168 Relationship between the NGP's varied according to the variability noticed in the region.  
 169 Correlation study revealed strong positive relationship between HT and DM in most of the cases  
 170 except TSW of NHZ and LSW of NWPZ (Table 2). Although HT and DH are assumed to have strong  
 171 positive relationship but this association was totally missing in NHZ. This relationship was also not  
 172 visible LSW of NWPZ. It was obvious that variations in the pre-anthesis period had no significant  
 173 impact on HT in such environments. DH was correlated positively with DM and negatively with GFD  
 174 under all conditions but strong association between DM and GFD was not realised in TSW of NWPZ,  
 175 NEPZ and CZ. It was an indication that variations occurring in DM might not have induced any shift  
 176 in GFD in such environments. It was clearly evident that if certain associations which are so obvious  
 177 otherwise (like relationship between HT and DM, DH and HT) fail to establish under certain  
 178 environments in spite of comparable variation level (CV); it is fair enough to assume that the trend  
 179 did not exist under those conditions. Every production environment has certain unique NGP  
 180 relationships which account for differential impact on grain formation and grain development.

181 **Table 2.** Correlation coefficient between NGP's under different production environments

| Relationship | Timely-sown wheat |         |         |        |         | Late-sown wheat |         |         |         |         |
|--------------|-------------------|---------|---------|--------|---------|-----------------|---------|---------|---------|---------|
|              | NWPZ              | NEPZ    | CZ      | PZ     | NHZ     | NWPZ            | NEPZ    | CZ      | PZ      | NHZ     |
| DM~HT        | 0.61**            | 0.30**  | 0.47**  | 0.34** | 0.19    | 0.07            | 0.28**  | 0.45**  | 0.29*   | 0.37**  |
| DM~DH        | 0.74**            | 0.76**  | 0.78**  | 0.78** | 0.62**  | 0.59**          | 0.59**  | 0.71**  | 0.55**  | 0.63**  |
| DM~GFD       | 0.09              | 0.01    | -0.05   | 0.56** | 0.39**  | 0.33*           | 0.45**  | 0.27*   | 0.59**  | 0.29*   |
| DH~HT        | 0.56**            | 0.20*   | 0.58**  | 0.25*  | 0.12    | 0.10            | 0.27*   | 0.61**  | 0.25*   | 0.18    |
| DH~GFD       | -0.60**           | -0.64** | -0.66** | -0.08  | -0.48** | -0.57**         | -0.46** | -0.49** | -0.35** | -0.57** |

182 \* and \*\* denote significance at  $P \leq 0.05$  and  $0.01$ , respectively

183

184



185

186 *NGP relationship with grain yield*

187 Phenology and plant height are major field expressions linked with wheat productivity in any  
188 environment, representing manifestation of the genetic (vernalization, dwarfing and photoperiod  
189 insensitive genes) and the non-genetic parameters like crop management and weather conditions  
190 (Saiyed *et al.*, 2009; Yadav *et al.*, 2014). Similarly, maturity duration is slated to have strong positive  
191 effect on the wheat yield (Garatuza-Payan *et al.*, 2018; Singh *et al.*, 2017; Xie *et al.*, 2015). Another  
192 NGP associated with productivity variations is the plant height (Bognár *et al.*, 2007). Since HT is  
193 also closely associated with DM, any alteration in height gets reflected in DM and the yield harvest.  
194 It is quite obvious that wheat productivity differences under different environments occur mainly  
195 because the duration to complete the life cycle differs. Due to diverse production environments and  
196 genetic makeup of the test entries; difference in yield and maturity duration are quite large in the  
197 Indian wheat. 21-year is a big time frame and so many variations must have occurred climatically  
198 and different plant types must have been tested during this long spell in every production  
199 environment. Fluctuations in weather conditions and diversity in the tested material therefore  
200 must have recorded different levels of variations in the grain as well as non-grain attributes (Table  
201 1).

202 It was amply clear that NGP's also play important role in regulating the yield potential as  
203 each one expressed significant relationship in 7-8 out of 10 environments (Table 3). In view of  
204 differential relationship amongst the NGPs, their contribution also varied under diverse production  
205 environments. Regression analysis revealed that magnitude of association between NGP's and grain  
206 yield varied in each environment. It was amply clear that NGP's also play important role in  
207 regulating the yield potential as each one expressed significant relationship in 7-8 out of 10  
208 environments. Amongst all environments, it was only TSW of NWPZ where every NGP established  
209 significant relationship with grain yield. It simply means that when growth conditions are

210 favourable in a given environment, number of NGP's associated with yield also popup. There was no  
 211 NGP which could establish relationship with yield under all conditions and the least important  
 212 amongst them was GFD.

213 **Table 3.** Relationship of individual NGP with wheat yield in different production environments of  
 214 India

| Parameter | Coefficient of determination ( $R^2$ ) |         |        |         |        |                  |         |         |         |         |
|-----------|----------------------------------------|---------|--------|---------|--------|------------------|---------|---------|---------|---------|
|           | Timely-sown wheat                      |         |        |         |        | Late- sown wheat |         |         |         |         |
|           | NWPZ                                   | NEPZ    | CZ     | PZ      | NHZ    | NWPZ             | NEPZ    | CZ      | PZ      | NHZ     |
| HT        | 0.45***                                | 0.09*** | 0.14** | 0.03    | 0.00   | 0.08**           | 0.04*   | 0.12*** | 0.10**  | 0.20*** |
| DH        | 0.09**                                 | 0.01    | 0.10*  | 0.15*** | 0.04   | 0.03             | 0.10**  | 0.10**  | 0.16*** | 0.08*   |
| GFD       | 0.09**                                 | 0.06**  | -0.09* | 0.00    | 0.01   | 0.07**           | 0.02    | 0.03    | 0.00    | 0.03    |
| DM        | 0.39***                                | 0.11*** | 0.03   | 0.12**  | 0.07** | 0.22***          | 0.18*** | 0.23*** | 0.09**  | 0.03    |
| HT+DH     | 0.46***                                | 0.09**  | 0.16** | 0.16**  | 0.04   | 0.11***          | 0.12**  | 0.13**  | 0.21*** | 0.25*** |
| DH +GFD   | 0.45***                                | 0.18*** | 0.12*  | 0.16**  | 0.07** | 0.23***          | 0.19*** | 0.24*** | 0.16*** | 0.08    |
| All NGP's | 0.63***                                | 0.22**  | 0.17** | 0.16**  | 0.08*  | 0.30***          | 0.20*** | 0.27*** | 0.21*** | 0.27*** |

215 \*, \*\* and \*\*\* denote significance of  $R^2$  at  $P \leq 0.05$ , 0.01 and 0.001, respectively

216

217 Although wheat productivity in NWPZ matched CZ under timely-sown condition, huge  
 218 difference could be seen in the impact of NGP's. It underlined that the variations created in NGP's  
 219 through scientific interventions and natural climatic variations were exploited to high capacity in  
 220 TSW of NWPZ whereas prospects of exploiting such variations were rather limited in CZ (Table 1  
 221 and 3). Relevance of individual NGP in yield of TSW in NWPZ was very high in case of HT and DM  
 222 ( $R^2: \geq 0.40$ ). Highest  $R^2$  value recorded in TSW of all other zones was 0.15 noticed for DH in PZ. In  
 223 LSW however,  $R^2 \geq .20$  could be noticed for HT in NHZ and DM in NWPZ/ CZ.

224 Height and heading are two important growth factors related to the vegetative phase and it  
 225 is important to understand and fragment their contribution during this developmental phase.  
 226 Composite impact of these two factors was similar to that of HT in both production conditions of  
 227 NWPZ, TSW of NEPZ/ CZ and LSW of NHZ (Table 3). It ascertained that during vegetative phase, it  
 228 was only the height (not heading) which regulated wheat yield in such environments. It means that

229 when HT shows sign of increase due to favouring climate or the scientific interventions; no big yield  
230 benefit is realised through DH in such environments which means that the grain number remains  
231 nearly the same. Significant increase in grain number under such situations is feasible only when  
232 tillering is enhanced through breeding. But when lateral growth intensifies, flowering is  
233 automatically delayed and the prolonged vegetative phase results in increased grain number. At the  
234 same time even if flowering gets extended due to agri-ecology or genotypic differences but crop  
235 face abiotic pressure in the vegetative phase, there can always be reduction in plant height which  
236 ultimately results in the yield loss (Anjum *et al.*, 2017). On the contrary, out of the two only DH  
237 expressed significant contribution in TSW of PZ and LSW of NEPZ/ CZ which showed that benefit of  
238 congenial climatic conditions in these environments was realised through DH only. Role of NGP's in  
239 grain yield was limited in NHZ as only DM mattered to some extent in TSW whereas only HT was  
240 prominent in LSW. Contribution of vegetative phase linked NGP's was significant in LSW of PZ  
241 condition and synergy was derived when HT and DH were regressed together against yield.

242 Although several reports point relevance of GFD in grain development (Xie *et al.*, 2015; Wu  
243 *et al.*, 2018), its positive contribution in yield could only be cited in some production environments  
244 of northern plains of India, especially TSW of NWPZ and NEPZ; and LSW of NWPZ. Synergy was also  
245 visible when DH and GFD were regressed together in both zones of IGP as DM turned highly  
246 significant even though individual impact of HD or GFD was not high. Results related to CV had  
247 illustrated that variation level recorded in DM was magnified in DH and GFD in many environments  
248 and this distinction was very clear in northern India (Table 1). It underlines that increase in DH can  
249 lead to better grain bearing in northern India but higher yield gain can only be achieved when  
250 proper GFD is available. Similarly, enhanced GFD might fail to deliver good yield if flowering is  
251 enforced early. Similar relationship could also be noticed in LSW of NEPZ and CZ. CZ was a unique  
252 example where yield in TSW was benefitted by DH but impact of GFD was negative. As result, yield  
253 registered no significant relationship with maturity in this particular environment. Increased TGW

254 in TSW of CZ was at the cost of reduced grain number affected by shortening of the vegetative  
255 phase. This was the only production environment in the country where TGW was adversely related  
256 to wheat productivity. Further, irrelevance of a given NGP in grain yield cannot be attributed to lack  
257 of variability (Table 1); it can also happen when direct effect of a given component is marginal.

258

### 259 *Collective contribution of NGP's in grain yield*

260 In multiple regression analysis,  $R^2$  value obtained through combinations like HT+DH+GFD,  
261 HT+DH+MAT and all 4 NGP's together was similar. It's only because GFD was a derived component  
262 from DM and DH. Since, it's not easy to exercise selection on the basis of GFD in the field, this factor  
263 was excluded and the choice was limited to HT, DH and DM. Collective impact of NGP's was highly  
264 significant in wheat yield of each production environment (Table 4). Indirect contribution of NGP's  
265 was significant in every environment but the magnitude ( $R^2$  value) varied from 0.07 to 0.61. In  
266 comparison to individual effect, combination of NGP's was beneficial in majority of the cases. This  
267 impact was highest in NWPZ in both categories of wheat and lowest in TSW of NHZ.  $R^2$  value  
268 underlines percent variations in yield associated with a given NGP or group of NGP's. In most  
269 congenial wheat growing environment of the country i.e. TSW of NWPZ; even 61% yield variations  
270 could be accounted by NGP's alone. In contrast, their contribution was limited to just 7%. Actually  
271 level of cold stress vary each year in the hill due to climatic fluctuations which results into high  
272 degree of yield fluctuations (Table 1). In all other production environments, 16 to 30% variations in  
273 grain yield were accrued through NGP's. High  $R^2$  value does not indicate that TSW of NWPZ could  
274 make best use of the climatic conditions for suited for wheat growth. It could also have happened  
275 because of the desired genetic variations created in NGP's through wheat breeding. Variations  
276 derived through the scientific interventions can be spotted in the wheat genotypes developed in  
277 this region for height and the phenological expressions. Emphasis in this region is also given to  
278 effective tillering which influence height, heading and maturity as well. Plotting of grain yield

279 against maturity period countrywide (N: 919) had clearly illustrated that NWPZ-TS environment is  
280 distinct, indeed as entries developed and tested in this environment (maturity:  $142 \pm 4$  days)  
281 formed a separate cluster altogether (Fig 1). Entries of the maturity range noticeable in NHZ (Table  
282 1) were found scattered in another cluster. Irrespective of the production condition, all test entries  
283 pertaining to the Indian plains (except NWPZ-TS), were accommodated in single cluster.

284

285 **Figure 1** Maturity duration and wheat productivity under Indian environments

286

287 *Key contributors in wheat yield*

288 Impact of individual components was also examined in the multiple regression analysis. It was  
289 observed that all of them expressed significance only in TSW of IGP. Otherwise just one or two were  
290 main drivers of this relationship. Analysis was further done to keep only those constituents which  
291 exerted significance in multiple regression analysis (Table 4). Even though individual impact of  
292 each constituent (HT, DH and DM) was positive in IGP (Table 3), contribution of DH turned negative  
293 in this combined relationship. In NEPZ-TS environment, only HT and DM were relevant individually  
294 (Table 3) but regression equation indicated that just like the adjoining zone i.e. NWPZ, DH was also  
295 equally important and its indirect contribution was significant, too. Under late-sown condition, just  
296 two factors i.e. HT and DM were found relevant in NWPZ whereas just one figured in NEPZ. In CZ,  
297 only height mattered in TSW whereas maturity was crucial for LSW. Situation was different in the  
298 adjoining PZ as only DH was the real deriving force in TSW whereas HT and DH were important in  
299 LSW. In NHZ, DM proved to be the main yield regulator of TSW whereas HT was key yield  
300 determinant in LSW. Importance of height in LSW of NHZ was also evident when zone-wise  
301 comparison was made earlier in Table 1.

302

303 **Table 4.** Multiple regression statistics of key contributors in wheat yield in different production  
304 environments

| Parameter                     | Timely-sown wheat |         |        |         |        | Late- sown wheat |         |         |         |         |
|-------------------------------|-------------------|---------|--------|---------|--------|------------------|---------|---------|---------|---------|
|                               | NWPZ              | NEPZ    | CZ     | PZ      | NHZ    | NWPZ             | NEPZ    | CZ      | PZ      | NHZ     |
| R <sup>2</sup> : All NGP's    | 0.63***           | 0.22*** | 0.14** | 0.16**  | 0.07*  | 0.28***          | 0.18*** | 0.23*** | 0.21*** | 0.20*** |
| Coefficient of associated NGP |                   |         |        |         |        |                  |         |         |         |         |
| Plant height                  | 0.46***           | 0.11**  | 0.27** | NS      | NS     | 0.23***          | NS      | NS      | 0.17*   | 0.33*** |
| Heading days                  | -0.52***          | -0.32** | NS     | 0.15*** | NS     | NS               | NS      | NS      | 0.34**  | 0.34**  |
| Maturity days                 | 0.86***           | 0.63*** | NS     | NS      | 0.23** | 0.62***          | 0.42*** | 0.38**  | NS      | NS      |

305  
306  
307 *Selection strategy to harness yield and grain weight through NGP's*  
308 Genetic variability, climatic variations and direct effect; they all matter in deciding the bottleneck  
309 factor in grain yield under any production environment. It was quite evident in this study that  
310 NGP's can be exploited as yield contributor in wheat. For effective implementation, it is imperative  
311 to devise a strategy based upon minimum number of NGP's in such a way that there is simultaneous  
312 gain in yield and TGW. If not, at least there should not be a case where yield gain is harnessed with a  
313 premium on grain weight. Since all NGP's are not related to yield in every production environment  
314 (Table 3), only the key components can be exploited to formulate selection index. Enrichment of  
315 wheat yield through enhanced plant height and prolonged vegetative duration had been suggested  
316 for the Indian subcontinent (Jamali and Ali, 2008; Laxman *et al.*, 2014). Reports from Pakistan and  
317 China had also emphasised selection through improved height and larger flowering or reproductive  
318 periods (Duan *et al.*, 2018; Khan *et al.*, 2000; Wu *et al.*, 2018). Advantage of height and crop  
319 phenology had also been reported in some Indian environments by Mohan *et al.* (2017). Such  
320 phenotypic expressions are indicators of good biomass accumulation accrued from healthier  
321 vegetative growth. In the era of green revolution, reduced height had been preferred in wheat  
322 breeding for a long time due to less lodging loss but it put a ceiling on the plant height, therefore,  
323 the role of tall-dwarfs had also been acknowledged in the development of the high-yielding semi-

324 dwarf wheat's in the green revolution (Würschum *et al.*, 2017; Mohan *et al.*, 2017; Mohan *et al.*,  
325 2017). It is also well established that flowering in wheat depends upon accumulation of certain  
326 amount of heat units and this had been amply demonstrated earlier in two contrasting zones of  
327 India i.e. NWPZ and CZ (Mohan *et al.*, 2017a). Thus breaking the yield barrier in wheat will require  
328 fine tuning of the sink-source relationship which requires simultaneous increase in grain number  
329 and the available assimilates for grain filling. But making selection for high tillering or grain bearing  
330 is not easy. Often such plants flower late and get less time for proper grain filling.

331 On the basis of information gathered about the key components (Table 4), simple and easy  
332 to adopt inference can be generated for simultaneous improvement in grain yield and grain weight.  
333 Identification of key NGP's make the job easy for the breeders as by application of these 1-2  
334 indicators in the field, significant yield improvement can be anticipated in wheat. The key factors  
335 were common in TSW of NWPZ and NEPZ which underlines that positive selection for height and  
336 maturity in early flowering genotypes can be highly useful to improve productivity of timely-sown  
337 wheat in the IGP (Table 5). Besides yield, this selection strategy can also benefit TGW in a  
338 significant way. To develop high yielding genotypes for LSW of NWPZ; field selection based upon  
339 just two NGP's i.e. HT and DM can be instrumental for significant productivity improvement but  
340 yield gain will be less in comparison to NWPZ and there shall not be any improvement in TGW  
341 either. In LSW of NEPZ, only DM is the main predictor for yield and it also helps to improvise TGW  
342 as well. Plant height should be given maximum importance in TSW of CZ whereas maturity is  
343 crucial for LSW of the region. However, no extra advantage through TGW is expected through this  
344 planning. Selection tool can be different in the adjoining PZ where DH is the lone predictor for grain  
345 yield in TSW. When coupled with HT, significant yield gain can also be anticipated in LSW of the  
346 region. Just like CZ, there is hardly any chance of grain size improvement through NGP's in PZ as  
347 well. Since yield variations are usually high in NHZ, precision might lack in the estimated benefits of  
348 NGP's. Still, selection for prolonged maturity in TSW and plant height in LSW can be expected to

349 boost wheat productivity. Preference to height in LSW of NHZ will also come in aid to grain weight  
 350 of the harvested produce.

351 **Table 5.** NGP based selection criteria for simultaneous improvement in yield and grain weight of  
 352 wheat

| Zone                     | Selection criteria                   | Coefficient of determination (R <sup>2</sup> ) |              |
|--------------------------|--------------------------------------|------------------------------------------------|--------------|
|                          |                                      | Grain yield                                    | Grain weight |
| <i>Timely-sown wheat</i> |                                      |                                                |              |
| NWPZ-TS                  | Height, early flowering and maturity | 0.631***                                       | 0.303***     |
| NEPZ-TS                  | Height, early flowering and maturity | 0.217***                                       | 0.130***     |
| CZ-TS                    | Height, early flowering              | 0.141**                                        | 0.058        |
| PZ-TS                    | Days to heading                      | 0.154***                                       | 0.022        |
| NHZ-TS                   | Early flowering, maturity            | 0.074*                                         | 0.004        |
| <i>Late-sown wheat</i>   |                                      |                                                |              |
| NWPZ-LS                  | Height and maturity                  | 0.283***                                       | 0.034        |
| NEPZ-LS                  | Maturity                             | 0.184***                                       | 0.178***     |
| CZ-LS                    | Maturity                             | 0.234***                                       | 0.005        |
| PZ-LS                    | Height and days to heading           | 0.206***                                       | 0.065        |
| NHZ-LS                   | Height                               | 0.202***                                       | 0.121**      |

353  
 354  
 355 This study further adds that height accompanied with unstressed maturity duration ensures  
 356 higher wheat productivity in most favourable wheat growth environment in India i.e. NWPZ-TS.  
 357 Under late-sown condition, it is often difficult to pick genotypes which mature late as elevated  
 358 temperature conditions and the hot winds enforce senescence in the leaves. Nevertheless, it is also  
 359 well known that Sonalika, a prominent old cultivar for late-sown condition, had expressed  
 360 productivity level well below the present varieties mainly because the new high-yield varieties  
 361 have comparatively longer maturity duration. During last stage of this study period, all these  
 362 components had been exploited in variety development programme of NWPZ-TS. Annual progress  
 363 report of crop improvement (ICAR-IIWBR, 2019) had mentioned tremendous improvement in grain  
 364 yield, plant height, bio-mass accumulation, harvest index, heading days and maturity duration when



365 growth condition were highly conducive. If performance of four leading TSW varieties of NWPZ (HD  
366 2967, HD 3086, DBW 88 and WH 1105) common during the crop seasons 2018 to 2020 is  
367 compared, average yield harvest was highest in 2019 (612 g  $\text{m}^{-2}$ ) in comparison to the previous  
368 year when yield was restricted to 539 g  $\text{m}^{-2}$ . It happened because there was 10 days increase in  
369 maturity duration (from 141 to 151 days) and 6 cm increase in plant height (from 98 to 104 cm).  
370 With increased height and favouring phenology, not only yield but TGW also increased from 38.8 to  
371 40.3 g. In comparison to 2019 harvest season, wheat productivity in this region declined to 580 g  $\text{m}^{-2}$   
372 in 2020 as height was reduced by two cm and maturity period by three days. Comparison of  
373 NGP's further revealed that genetic differences also counted for differential expressions in these  
374 four high yielding varieties. HD 3086 excelled because of longer grain ripening period (49 days) and  
375 good plant height (101 cm). HD 2967 drew advantage of extra height (103 cm) and longer maturity  
376 duration (148 days). DBW 88 had plant height (102) and maturity duration (147 days) almost  
377 similar to HD 2967 but it had advantage of early flowering and prolonged GFD. In spite of shorter  
378 maturity period (145 days) and reduced plant height (99 cm), WH 1105 was high yielding because  
379 phenology was partitioned well (HD: 98 days, GFD: 47 days).

380

### 381 **Conclusion**

382 Diverse production environments necessitate special wheat improvement strategy. At a time when  
383 wheat is touching the yield plateau, it is pertinent that vista of non-grain plant attributes is also  
384 reviewed. Breeders do keep an eye on these aspects while exercising selection in the segregating  
385 material but which parameter is to be emphasized in a given environment is the key. Artificial  
386 intelligence gathered through this investigation offers some silver lining. Simple and easily  
387 adoptable selection methodology devised through this study will surely enhance the prospects of  
388 yield improvement further. This information on potential uses of the non-grain yield determinants  
389 can bridge some gap in the yield barrier realised not only in India but all over the world. It assures

390 that with some strategic planning; prospects of wheat productivity enhancement can be improvised  
391 without directly touching the grain related parameters. Knowledge gained from this 21-years study  
392 period assures that variability in NGP's exists in each production environment. In the past, this  
393 variation was exploited to certain extent unknowingly. But when applied with some strategic  
394 planning, prospects of yield improvement can surely be improved further. It's easy to make  
395 selection for these phenotypic traits in the field as it will improvise biomass through plant height;  
396 grain number through enhanced vegetative phase and grain weight by adjusting the grain filling  
397 duration. Since impact can be different under divergent environments, breeders can choose the  
398 factors or combination of NGP's required for yield improvement in a given environment.

399

#### 400 **Acknowledgments**

401 The work is an outcome of a core project funded by ICAR (Project No.  
402 CRSCIIWBRCIL201500100182), New Delhi and the authors express their sincere thanks to the  
403 Director, ICAR-IIWBR for permitting use of the data generated in All India Coordinated Research  
404 Project (AICRP) on Wheat and Barley for this analysis. The efforts made by associated wheat  
405 research workers in trial conduct and data reporting are also acknowledged.

406

#### 407 **References**

- 408 **Anjum SA, Ashraf U, Zohaib A, et al.** 2017. Growth and developmental responses of crop plants  
409 under drought stress: a review. *Zemdirbyste-Agriculture* **104**, 267–276.  
410 <https://doi.org/10.13080/z-a.2017.104.034>
- 411 **Asseng S, Cammarano D, Basso B, et al.** 2017. Hot spots of wheat yield decline with rising  
412 temperatures. *Global Change Biology* **23** 2464–2472.
- 413 **Bognár Z, Láng L, Bedő Z.** 2007. Effect of environment on the plant height of wheat germplasm.  
414 *Cereal Research Communications* **35** 281–284. <https://doi.org/10.1556/CRC.35.2007.2.29>
- 415 **Brinton J, Uauy C.** 2019. A reductionist approach to dissecting grain weight and yield in wheat.  
416 *Journal of Integrative Plant Biology* **61** 337–358. <https://doi.org/10.1111/jipb.12741>

- 417 **Duan J, Wu Y, Zhou Y, et al.** 2018. Approach to Higher Wheat Yield in the Huang-Huai Plain:  
418 Improving Post-anthesis Productivity to Increase Harvest Index. *Frontiers in Plant Science* **9** 1457.  
419 <https://doi.org/10.3389/fpls.2018.01457>
- 420 **Garatuza-Payan J, ArgenteI-Martinez L, Yopez EA, et al.** 2018. Initial response of phenology and  
421 yield components of wheat ( *Triticum durum* L., CIRNO C2008) under experimental warming field  
422 conditions in the Yaqui Valley. *PeerJ* **6**, e5064. <https://doi.org/10.7717/peerj.5064>
- 423 **Grant N, Mohan A, Sandhu D, Gill K.** 2018. Inheritance and Genetic Mapping of the Reduced Height  
424 (Rht18) Gene in Wheat. *Plants* **7** 58. <https://doi.org/10.3390/plants7030058>
- 425 **ICAR-IIWBR,** 2019. Progress Report of AICRP on Wheat and Barley 2018-19, Crop Improvement.  
426 ICAR - Indian Institute of Wheat and Barley Research, Karnal, Haryana, India.
- 427 **Jamali K, Ali SA.** 2008. Yield and yield components with relation to plant height in semi-dwarf  
428 wheat. *Pakistan Journal of Botany* **40** 1805–1808.
- 429 **Khan AS, Khan Mkr, Khan TM, et al.** 2000. Genetic analysis of plant height, grain yield and other  
430 traits in wheat (*Triticum aestivum* L.). *International Journal of Agriculture and Biology* **2**129–132.
- 431 **Laxman VS, Solanki YPS, Redhu AS.** 2014. Phenological development, grain growth rate and yield  
432 relationships in wheat cultivars under late sown condition. *Indian Journal of Plant Physiology* **19**  
433 222–229. <https://doi.org/10.1007/s40502-014-0105-8>
- 434 **Mishra S, Singh S, Patil R, et al.** 2014. Breeding for heat tolerance in Wheat. *Genetics* **2** 1.
- 435 **Mohan D, Singh S, Gupta R.** 2011. Vibrancy of the Indian wheat in upholding yield and quality  
436 under global environmental change. In: Singh SS, Hanchinal RR, Singh G., Sharma RK, Tyagi BS,  
437 Saharan MS, and Sharma Indu, eds. *Wheat: Productivity Enhancement under Changing Climate*,  
438 Narosa Publishing House, New Delhi 87–94.
- 439 **Mohan D, Tiwari V, Gupta RK.** 2017. Progression in yield and value addition of Indian bread  
440 wheat - An analysis. *Indian Journal of Genetics and Plant Breeding* **77** 16–24.  
441 <https://doi.org/10.5958/0975-6906.2017.00003.7>
- 442 **Mohan D, Mamrutha H, Tyagi B.** 2017, a. Weather conditions favoring wheat (*Triticum aestivum*)  
443 productivity in hot climate of central India and congenial environment of north-western plains.  
444 *Indian Journal of Agricultural Sciences* **87** 278–281.
- 445 **Mondal S, Singh RP, Mason ER, et al.** 2016. Grain yield, adaptation and progress in breeding for  
446 early-maturing and heat-tolerant wheat lines in South Asia. *Field Crops Research* **192** 78–85.  
447 <https://doi.org/10.1016/j.fcr.2016.04.017>
- 448 **Pandey GC, Mamrutha H, Tiwari R, et al.** 2015. Physiological traits associated with heat tolerance  
449 in bread wheat (*Triticum aestivum* L.). *Physiology and Molecular Biology of Plants* **21** 93–99.

- 450 **Reynolds M, Foulkes MJ, Slafer GA, et al.** 2009. Raising yield potential in wheat. *Journal of*  
451 *Experimental Botany* **60** 1899–1918. <https://doi.org/10.1093/jxb/erp016>
- 452 **Rezaei EE, Siebert S, Hüging H, Ewert F.** 2018. Climate change effect on wheat phenology depends  
453 on cultivar change. *Scientific Reports* **8** 4891. <https://doi.org/10.1038/s41598-018-23101-2>
- 454 **Saiyed IM, Bullock PR, Sapirstein HD, et al.** 2009. Thermal time models for estimating wheat  
455 phenological development and weather-based relationships to wheat quality. *Canadian Journal of*  
456 *Plant Science* **89** 429–439. <https://doi.org/10.4141/CJPS07114>
- 457 **Sharma D, Pandey GC, Mamrutha HM, et al.** 2019. Genotype–Phenotype Relationships for  
458 High-Temperature Tolerance: An Integrated Method for Minimizing Phenotyping Constraints in  
459 Wheat. *Crop Science* **59** 1973–1982. <https://doi.org/10.2135/cropsci2019.01.0055>
- 460 **Singh HV, Kumar SN, Ramawat N, Harit R.** 2017. Response of wheat varieties to heat stress under  
461 elevated temperature environments. *Journal of Agrometeorology* **19** 17.
- 462 **Solanki N, Samota SD, Chouhan BS, Nai G.** 2017. Agrometeorological indices, heat use efficiency  
463 and productivity of wheat (*Triticum aestivum*) as influenced by dates of sowing and irrigation.  
464 *Journal of Pharmacognosy and Phytochemistry* **6** 176–180.
- 465 Wu X, Tang Y, Li C, Wu C. 2018. Characterization of the rate and duration of grain filling in wheat in  
466 southwestern China. *Plant Production Science* **21** 358–369.  
467 <https://doi.org/10.1080/1343943X.2018.1518722>
- 468 **Würschum T, Langer SM, Longin CFH, et al.** 2017. A modern Green Revolution gene for reduced  
469 height in wheat. *The Plant Journal* **92** 892–903. <https://doi.org/10.1111/tpj.13726>
- 470 **Xie Q, Mayes S, Sparkes DL.** 2015. Carpel size, grain filling, and morphology determine individual  
471 grain weight in wheat. *EXBOTJ* **66** 6715–6730. <https://doi.org/10.1093/jxb/erv378>
- 472 **Yadav SK, Singh AK, Baghel SS, et al.** 2014. Assessment of genetic variability and diversity for yield  
473 and its contributing traits among CIMMYT based wheat germplasm. *Journal of Wheat Research* **6**  
474 154–159.
- 475 **Yang C, Fraga H, van Ieperen W, et al.** 2019. Effects of climate change and adaptation options on  
476 winter wheat yield under rainfed Mediterranean conditions in southern Portugal. *Climatic Change*  
477 154, 159–178. <https://doi.org/10.1007/s10584-019-02419-4>

**Table 1.** Overall mean and coefficient of variation for six metric traits under diverse production environments of India

| Characteristic                      | Timely-sown wheat |               |            |            |             | Late-sown wheat |              |            |            |             |
|-------------------------------------|-------------------|---------------|------------|------------|-------------|-----------------|--------------|------------|------------|-------------|
|                                     | NWPZ<br>(123)     | NEPZ<br>(136) | CZ<br>(58) | PZ<br>(70) | NHZ<br>(95) | NWPZ<br>(121)   | NEPZ<br>(86) | CZ<br>(89) | PZ<br>(79) | NHZ<br>(62) |
| Grain yield (g · m <sup>2</sup> )   | 509               | 422           | 492        | 436        | 427         | 416             | 356          | 426        | 386        | 284         |
| Heading days                        | 96.8              | 79.3          | 67.7       | 61.2       | 126         | 82.6            | 67.7         | 62.2       | 56.4       | 105         |
| Maturity days                       | 142               | 122           | 117        | 106        | 169         | 121             | 107          | 106        | 97.2       | 145         |
| Grain filling days                  | 45.6              | 43.0          | 49.6       | 44.4       | 43.5        | 38.3            | 39.6         | 43.7       | 40.8       | 40.0        |
| Plant height (cm)                   | 93.8              | 91.6          | 88.7       | 82.4       | 98.7        | 88.2            | 85.7         | 80.2       | 79.3       | 82.5        |
| 1000-grain weight (g)               | 38.7              | 40.4          | 44.1       | 41.4       | 40.1        | 36.6            | 37.4         | 40.5       | 39.5       | 39.4        |
| <i>Coefficient of variation (%)</i> |                   |               |            |            |             |                 |              |            |            |             |
| Grain yield                         | 10.2              | 08.9          | 08.4       | 09.8       | 15.1        | 09.8            | 09.0         | 09.9       | 09.1       | 19.8        |
| Heading days                        | 05.1              | 05.4          | 07.6       | 06.1       | 06.4        | 04.1            | 04.9         | 05.9       | 06.1       | 07.3        |
| Maturity days                       | 02.8              | 02.7          | 03.3       | 04.2       | 04.5        | 02.4            | 03.1         | 03.1       | 04.1       | 04.6        |
| Grain filling days                  | 07.3              | 06.5          | 06.5       | 06.3       | 15.8        | 07.5            | 07.5         | 06.1       | 08.8       | 15.3        |
| Plant height                        | 06.6              | 07.8          | 04.1       | 06.8       | 07.1        | 05.2            | 07.2         | 06.9       | 06.0       | 09.4        |
| 1000-grain weight                   | 06.4              | 06.4          | 09.7       | 08.2       | 11.2        | 07.6            | 05.9         | 06.1       | 07.2       | 14.1        |

Figure in parenthesis indicate total number of entries evaluated during the 20-year study period

**Table 2.** Correlation coefficient between NGP's under different production environments

| Relationship | Timely-sown wheat |         |         |        |         | Late-sown wheat |         |         |         |         |
|--------------|-------------------|---------|---------|--------|---------|-----------------|---------|---------|---------|---------|
|              | NWPZ              | NEPZ    | CZ      | PZ     | NHZ     | NWPZ            | NEPZ    | CZ      | PZ      | NHZ     |
| DM~HT        | 0.61**            | 0.30**  | 0.47**  | 0.34** | 0.19    | 0.07            | 0.28**  | 0.45**  | 0.29*   | 0.37**  |
| DM~DH        | 0.74**            | 0.76**  | 0.78**  | 0.78** | 0.62**  | 0.59**          | 0.59**  | 0.71**  | 0.55**  | 0.63**  |
| DM~GFD       | 0.09              | 0.01    | -0.05   | 0.56** | 0.39**  | 0.33*           | 0.45**  | 0.27*   | 0.59**  | 0.29*   |
| DH~HT        | 0.56**            | 0.20*   | 0.58**  | 0.25*  | 0.12    | 0.10            | 0.27*   | 0.61**  | 0.25*   | 0.18    |
| DH~GFD       | -0.60**           | -0.64** | -0.66** | -0.08  | -0.48** | -0.57**         | -0.46** | -0.49** | -0.35** | -0.57** |

\* and \*\* denote significance at  $P \leq 0.05$  and  $0.01$ , respectively

**Table 3.** Relationship of individual NGP with wheat yield in different production environments of India

| Parameter | Coefficient of determination ( $R^2$ ) |         |        |         |        |                  |         |         |         |         |
|-----------|----------------------------------------|---------|--------|---------|--------|------------------|---------|---------|---------|---------|
|           | Timely-sown wheat                      |         |        |         |        | Late- sown wheat |         |         |         |         |
|           | NWPZ                                   | NEPZ    | CZ     | PZ      | NHZ    | NWPZ             | NEPZ    | CZ      | PZ      | NHZ     |
| HT        | 0.45***                                | 0.09*** | 0.14** | 0.03    | 0.00   | 0.08**           | 0.04*   | 0.12*** | 0.10**  | 0.20*** |
| DH        | 0.09**                                 | 0.01    | 0.10*  | 0.15*** | 0.04   | 0.03             | 0.10**  | 0.10**  | 0.16*** | 0.08*   |
| GFD       | 0.09**                                 | 0.06**  | -0.09* | 0.00    | 0.01   | 0.07**           | 0.02    | 0.03    | 0.00    | 0.03    |
| DM        | 0.39***                                | 0.11*** | 0.03   | 0.12**  | 0.07** | 0.22***          | 0.18*** | 0.23*** | 0.09**  | 0.03    |
| HT+DH     | 0.46***                                | 0.09**  | 0.16** | 0.16**  | 0.04   | 0.11***          | 0.12**  | 0.13**  | 0.21*** | 0.25*** |
| DH +GFD   | 0.45***                                | 0.18*** | 0.12*  | 0.16**  | 0.07** | 0.23***          | 0.19*** | 0.24*** | 0.16*** | 0.08    |
| All NGP's | 0.63***                                | 0.22**  | 0.17** | 0.16**  | 0.08*  | 0.30***          | 0.20*** | 0.27*** | 0.21*** | 0.27*** |

\*, \*\* and \*\*\* denote significance of  $R^2$  at  $P \leq 0.05$ , 0.01 and 0.001, respectively

**Table 4.** Multiple regression statistics of key contributors in wheat yield in different production environments

| Parameter                     | Timely-sown wheat |         |        |         |        | Late- sown wheat |         |         |         |         |
|-------------------------------|-------------------|---------|--------|---------|--------|------------------|---------|---------|---------|---------|
|                               | NWPZ              | NEPZ    | CZ     | PZ      | NHZ    | NWPZ             | NEPZ    | CZ      | PZ      | NHZ     |
| $R^2$ : All NGP's             | 0.63***           | 0.22*** | 0.14** | 0.16**  | 0.07*  | 0.28***          | 0.18*** | 0.23*** | 0.21*** | 0.20*** |
| Coefficient of associated NGP |                   |         |        |         |        |                  |         |         |         |         |
| Plant height                  | 0.46***           | 0.11**  | 0.27** | NS      | NS     | 0.23***          | NS      | NS      | 0.17*   | 0.33*** |
| Heading days                  | -0.52***          | -0.32** | NS     | 0.15*** | NS     | NS               | NS      | NS      | 0.34**  | 0.34**  |
| Maturity days                 | 0.86***           | 0.63*** | NS     | NS      | 0.23** | 0.62***          | 0.42*** | 0.38**  | NS      | NS      |

**Table 5.** NGP based selection criteria for simultaneous improvement in yield and grain weight of wheat

| Zone                     | Selection criteria                   | Coefficient of determination ( $R^2$ ) |              |
|--------------------------|--------------------------------------|----------------------------------------|--------------|
|                          |                                      | Grain yield                            | Grain weight |
| <i>Timely-sown wheat</i> |                                      |                                        |              |
| NWPZ-TS                  | Height, early flowering and maturity | 0.631***                               | 0.303***     |
| NEPZ-TS                  | Height, early flowering and maturity | 0.217***                               | 0.130***     |
| CZ-TS                    | Height, early flowering              | 0.141**                                | 0.058        |
| PZ-TS                    | Days to heading                      | 0.154***                               | 0.022        |
| NHZ-TS                   | Early flowering, maturity            | 0.074 <sup>†</sup>                     | 0.004        |
| <i>Late-sown wheat</i>   |                                      |                                        |              |
| NWPZ-LS                  | Height and maturity                  | 0.283***                               | 0.034        |
| NEPZ-LS                  | Maturity                             | 0.184***                               | 0.178***     |
| CZ-LS                    | Maturity                             | 0.234***                               | 0.005        |
| PZ-LS                    | Height and days to heading           | 0.206***                               | 0.065        |
| NHZ-LS                   | Height                               | 0.202***                               | 0.121**      |

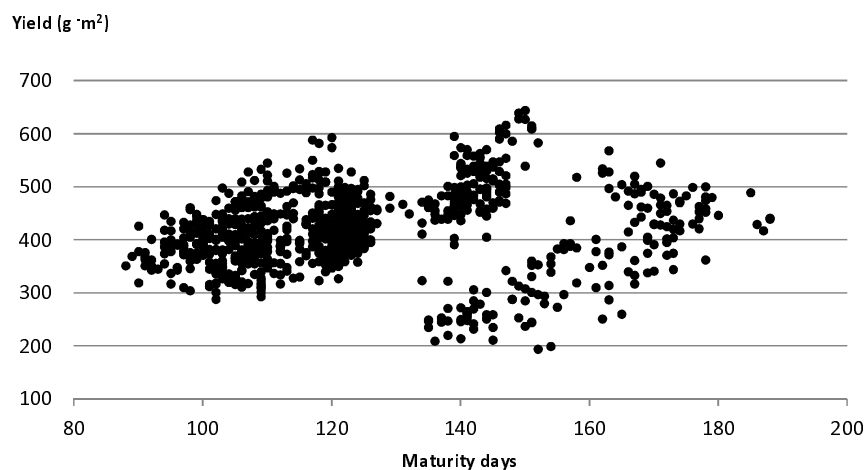

**Figure 1** Maturity duration and wheat productivity under Indian environments
